# Supplementary material for: Co-Creating a Nature-Based Social Prescription Intervention in Urban Socioeconomically Deprived Neighbourhoods: A Case Study from RECETAS Project in Barcelona, Spain
Source: Hindawi journal article supplement (doi:10.1155/2023/6616991), 2023-07-20
Supplement: f1 [file 6616991.f1.docx]

**SUPPLEMENTARY MATERIAL**

**Co-creating a nature-based social prescription intervention in urban socioeconomically- deprived neighbourhoods: A case study from RECETAS project in Barcelona, Spain**

Authors: Celia Santos-Tapia, Laura Hidalgo, Pol Jimenez-Arenas, Cristina Casajuana, Sara Doménech, Aida Ballester-Lledó, Jill Litt, Ashby Sachs, Gabriela Garcia, Sergi Blancafort-Alias.

Tool template 1: Example of the Interview outline (English translation from the original version).

### Tool Template 2 - Sociogram canvas (English translation from the original version).

### Tool Template 3 - Identification of criteria canvas (English translation from the original version).

Tool Template 4. Map for gathering health assets in Les Roquetes.

Tool Template 5. Template for gathering nature activities and resources (English translation from the original version).

Table S1. Detailed description of the Community Plan (CP), the Community Health Roundtable (CHR).

Table S2. List of organizations that were part of the MC and the DG.

Table S3. List of questions from the evaluation survey (English translation from the original version).

Table S4. Detailed information about the nature activities and spaces that conformed the NBSP Menu.

Table S5. Results from the evaluation survey (English translation from the original version).

**Tool Template 1**. **Example of the Interview outline (English translation from the original version).** The questions (right) were posed according to the information to be obtained (left).

| **Information** | **Questions** |
| --- | --- |
| Presentation | **Question 1.** Briefly explain who you are, where you work, what your institution/organisation does and what your role in this institution/organisation is. |
| **Question 2**. How would you describe the neighbourhood and what is its track record in community action? |
| Learn the scale of loneliness and social isolation | **Question 3.** Would you say that social isolation and loneliness is a problem in your area of action? |
| Gain an idea of which population groups are most affected by this problem | **Question 4**. Which population groups do you think are suffering the most from social isolation and loneliness? |
| **Question 5**. Have you worked or had any kind of contact with any of them? |
| **Question 6**. Do you think that Roquetes is an ideal neighbourhood for conducting activities aimed at tackling loneliness and nature-based activities (closeness to Collserola, etc.)? |
| Identify potential health assets | **Question 7**. Which venues, facilities or assets in general might be useful for NBSP in the city/neighbourhood? |
| **Question 8.** Are you aware of facilities or assets in other neighbourhoods? |
| Identify initiatives or activities drawing on nature-based social prescribing prior to the RECETAS project | **Question 9**. Are you aware of any social prescribing initiative which is already underway? And nature-based? At the Barcelona or neighbourhood level. How is it accessed? Ask for contact. |
| **Question 10**. Does it work? What constructive aspects and limitations do you see? |
| **Question 11**. Where is it implemented (neighbourhood/city/province/national)? |

### **Tool Template 2. Sociogram canvas (English translation from the original version).** On the X axis, affinity to the project was represented ((-) little affinity > (+) great affinity) and on the Y axis, economic, social or convening power was represented ((-) little power > (+) high power). Two categories were used to identify the actors: (1) Color, to identify the kind of actor. Green = nature; Yellow = social prescribing; Blue = neither of the above but of interest to the project and (2) Shape, to identify the kind of organisation. Circle = government; Square = grassroots organisation; Triangle = private organisation.


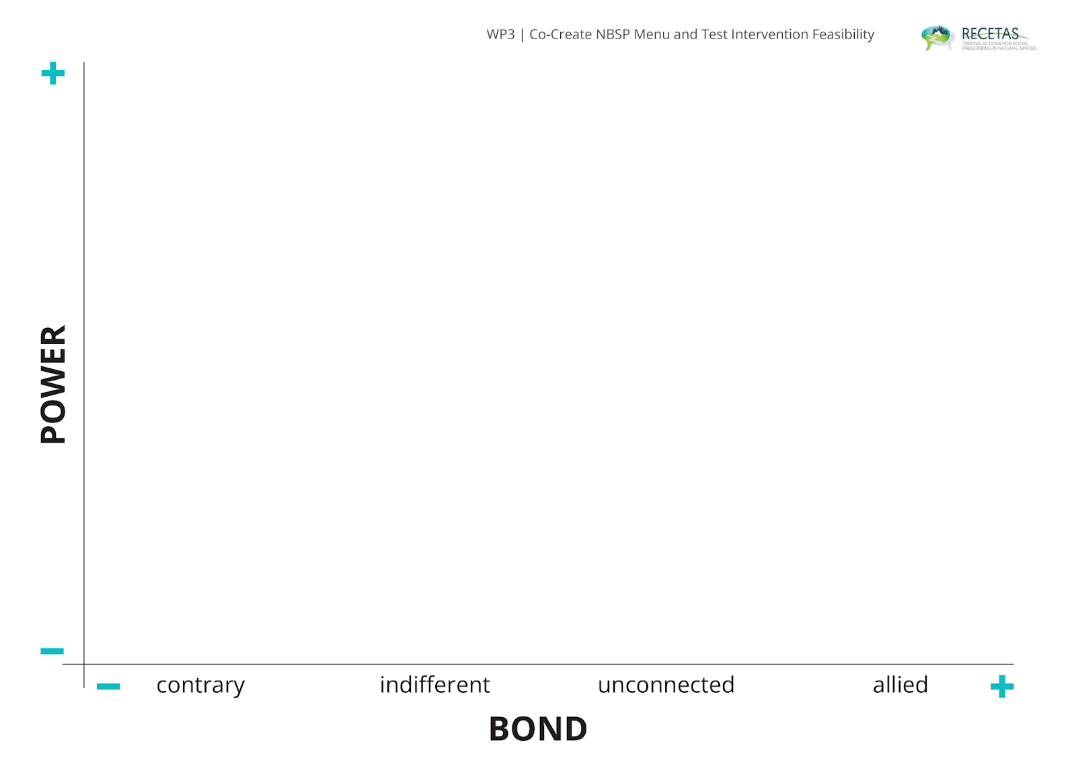

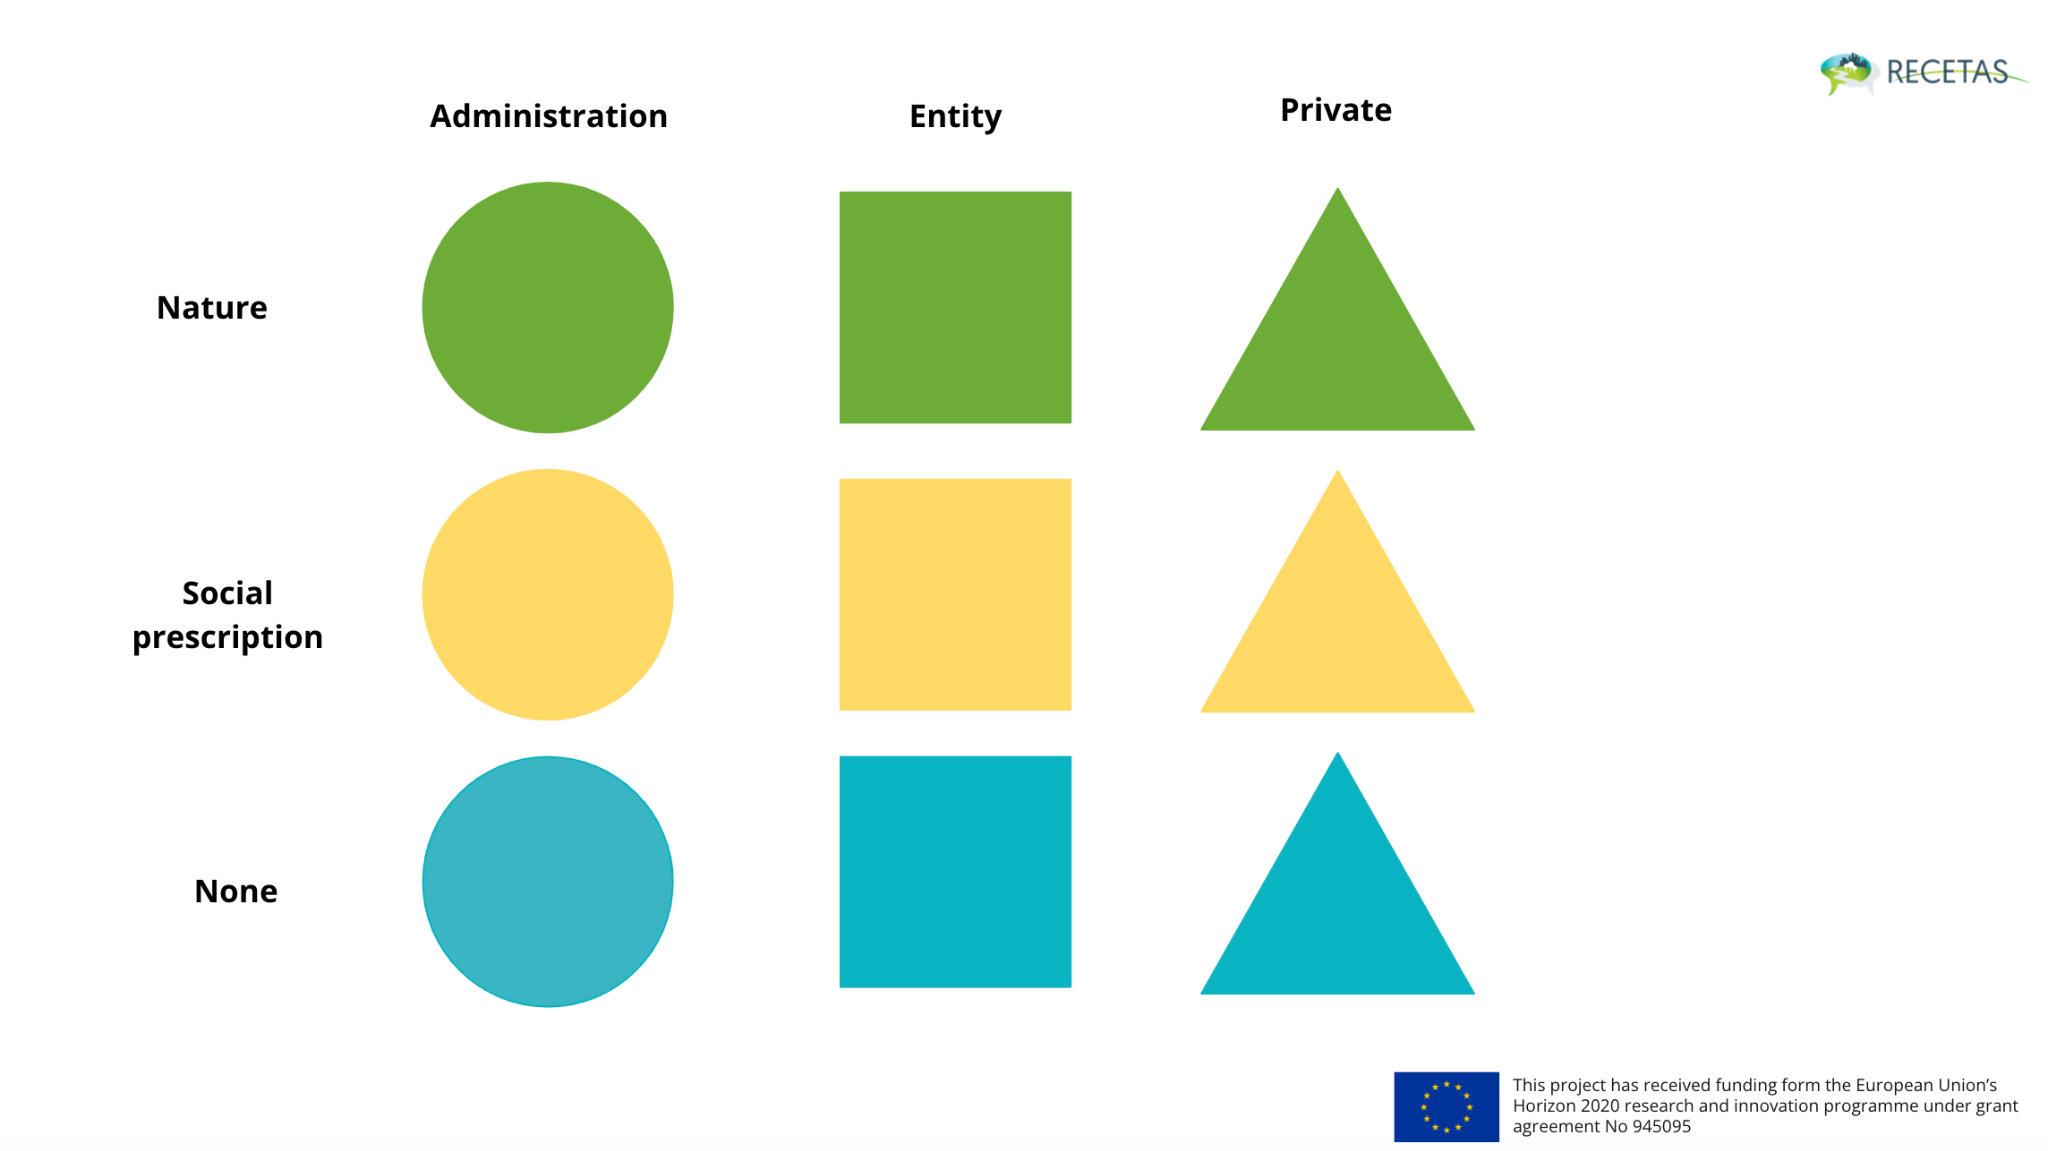


### **Tool Template 3. Identification of criteria canvas (English translation from the original version).** Three categories of criteria (intrapersonal, interpersonal and nature) were proposed and some examples of concrete issues were given to stimulate discussion (language, age diversity, gender diversity, accessibility, schedule, conciliation, orography).


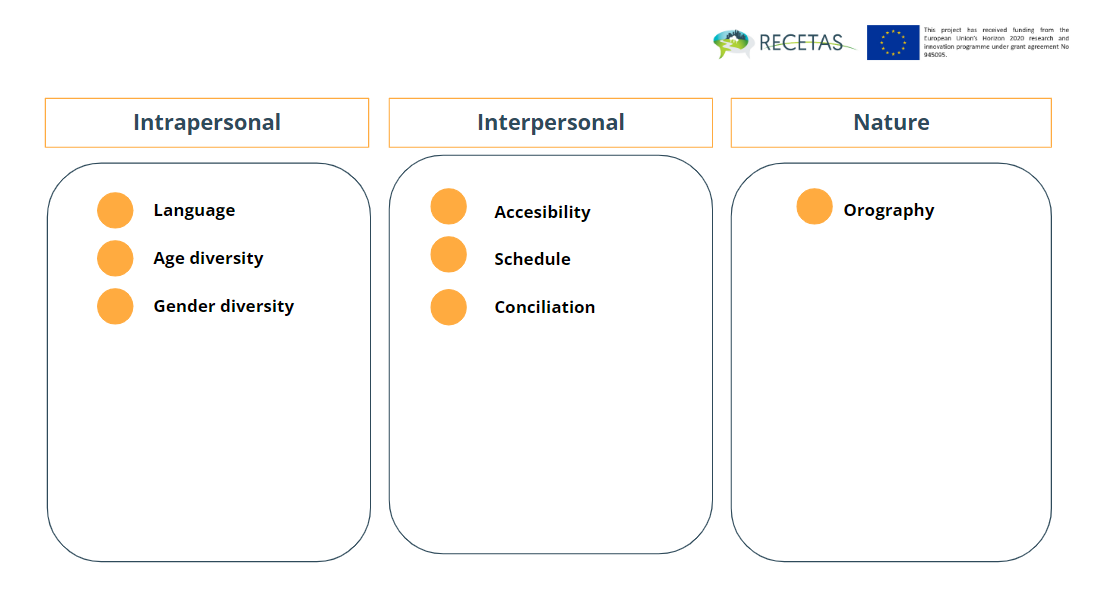


**Tool Template 4. Map for gathering health assets in Les Roquetes.**
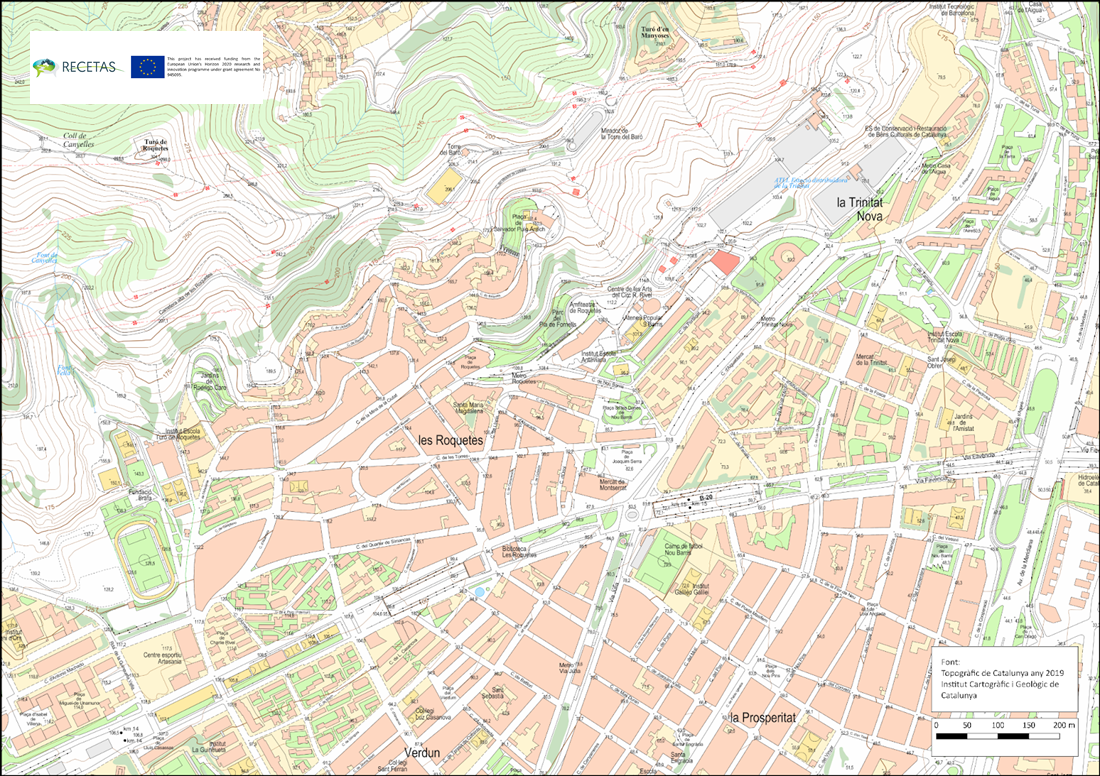


### **Tool Template 5. Template for gathering nature activities and resources (English translation from the original version).** The document contains sections to collect information on the details of the activities proposed and specific requirements, contact details, ideal target population, human resources and materials provided by the organisations and specific requirements to the RECETAS project.


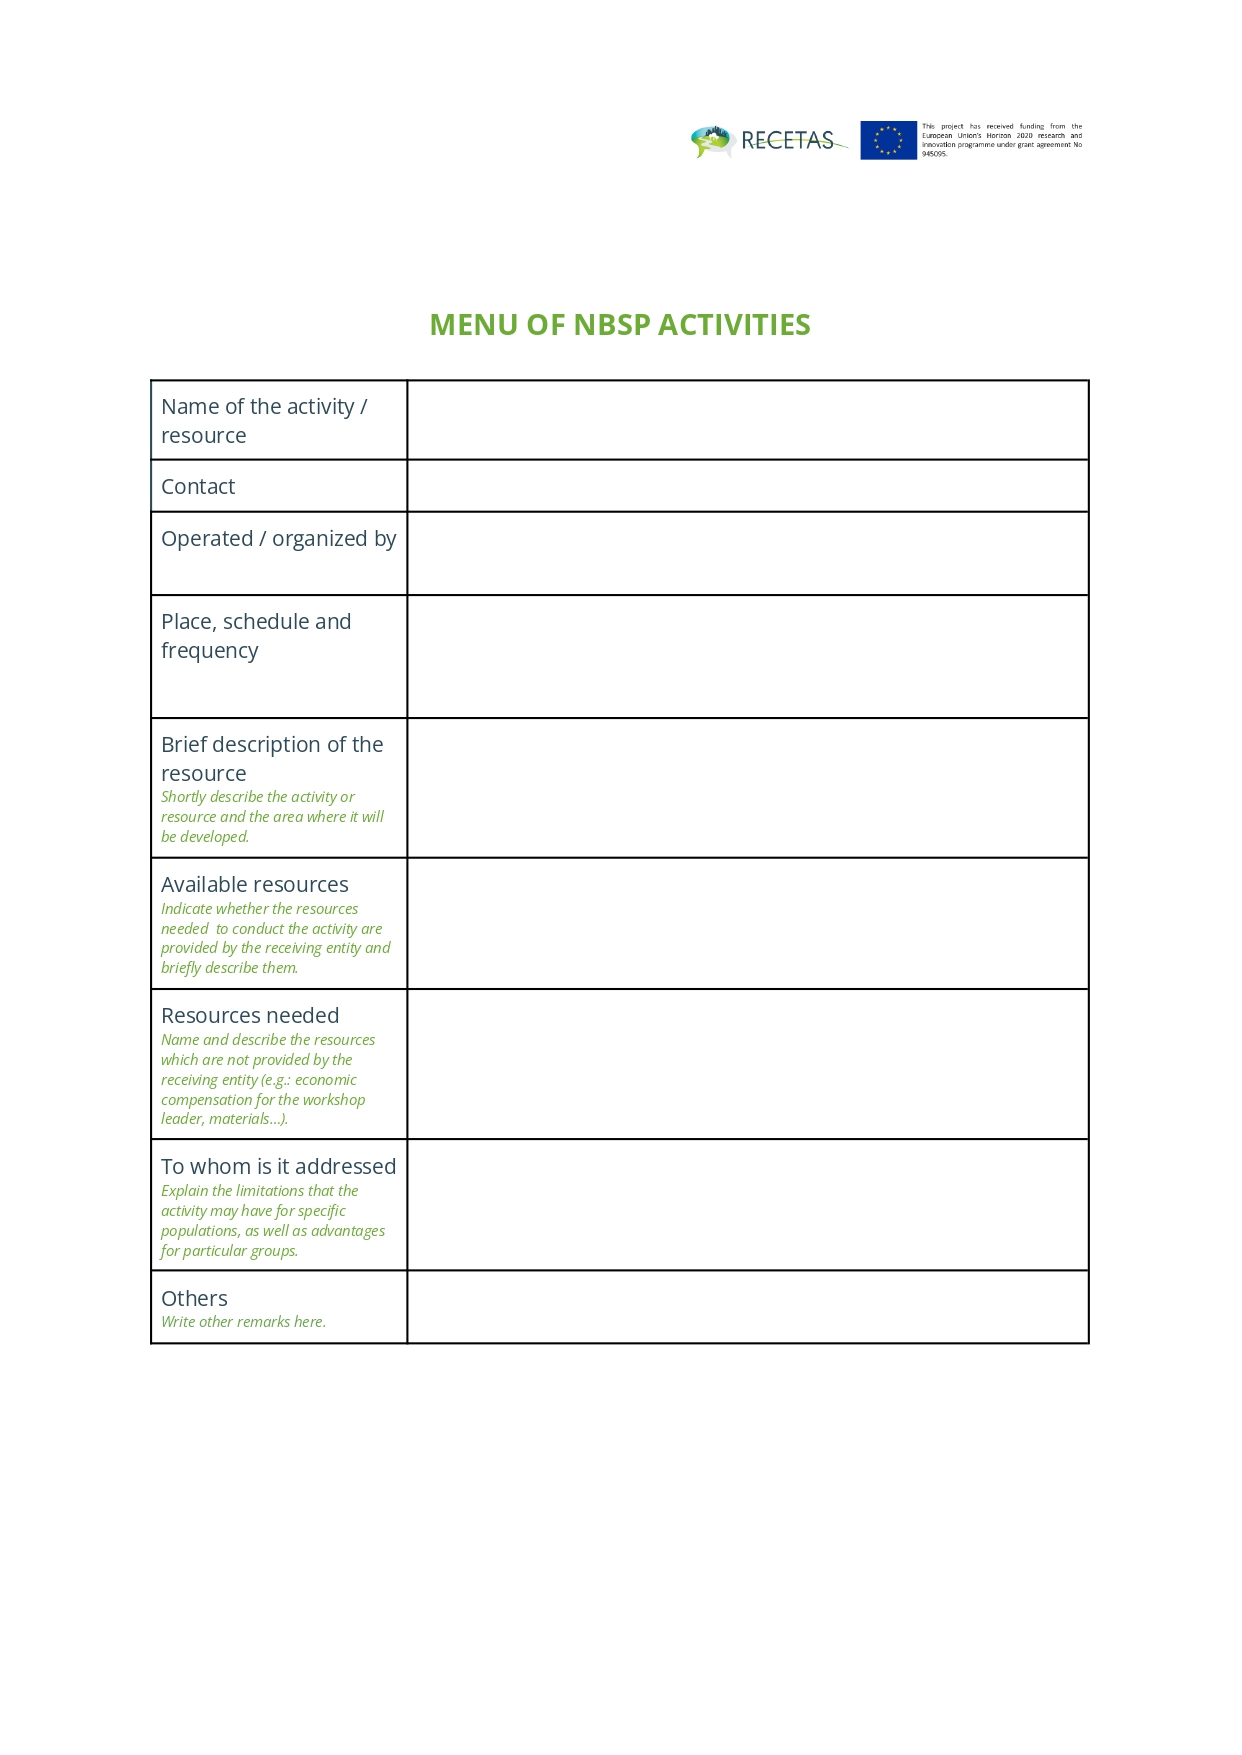


**Table S1. Detailed description of the Community Plan (CP) and the Community Health Roundtable (CHR).**

**Community Plan (CP)**

The Community Action Service, driven by the Barcelona City’s council, aims to accompany and strengthen existing processes in order to enhance their transformative aspect and encourage the emergence of new processes that bring cohesion and improvements to the neighbourhoods. This community action in the neighbourhoods takes place in the shape of a Community Plan (CP): networks which drive community projects whose main purpose is to bolster the community, enhance living conditions and step-up social inclusion and cohesion in order to deliver collective responses to collective problems. The CPs coordinate and bring together various local and neighbourhood organisations and government to draw up community proposals. In the case of the Roquetes CP, it is managed by the *Plataforma d'Entitats de Roquetes*, a second-tier organisation made up of local residents.

**Community Health Roundtable (CHR)**

The Community Health Roundtable (CHR) are forums present in the neighbourhoods that involve various local stakeholders who work on the physical, emotional and relational health of the neighbourhood, and more specifically on aspects such as mental health, sexual health, loneliness and addictions. In the case of the neighbourhood of Les Roquetes, the CHR is managed by de the Roquetes CP.

**Table S2. List of organizations that were part of the MC and the DG.**

| **Working group** | **Organizations** | **Topic area** | **Criteria of inclusion** |
| --- | --- | --- | --- |
| Monitoring Commission | Consorci del Parc Natural de la Serra del Collserola | Nature | Work in the field of nature, health or public health. |
| Agència de Salut Pública de Barcelona, Direcció de Serveis d’Acció Comunitària. | Health |
| Agència de Salut Pública de Catalunya, Promoció de la salut i salut comunitària | Health |
| Universitat de Vic, Departament de Ciències Socials i Salut Comunitària. | Health |
| Diputació de Barcelona, Àrea d'Igualtat i Sostenibilitat Social. | Social rights, equality, and community action |
| Ajuntament de Barcelona, Direcció de Serveis d'Acció Comunitària. | Social rights, equality, and community action |
| Agència de Salut Pública de Catalunya, Subdirecció de Drogodependències, Programa de Prescripció Social i Salut. | Health | Interest in taking part in the co-creation process. |
| Agència de Salut Pública de Catalunya, Subdirecció General de Promoció de la Salut. | Health |
| Ajuntament de Barcelona, Direcció de Serveis de Salut. | Health |
| Ajuntament de Barcelona, Àrea de Drets Socials, Justícia Global, Feminismes i LGTBI. | Social rights, equality, and community action |
| Driving Group | Roquetes Community Plan | Social rights, equality, and community action | Interest in taking part in the co-creation process. |
| CAP Roquetes | Health |
| Agència de Salut Pública de Barcelona | Health |
| Social Services | Social rights, equality, and community action |
|  | Associació Som del Barri | Social rights, equality, and community action |  |
|  | Casal de Gent Gran | Social rights, equality, and community action |  |
|  | Pare Manel | Social rights, equality, and community action |  |
|  | Cirerers | Social rights, equality, and community action |  |
|  | Humus Therapy | Nature |  |

**Table S3. List of questions from the evaluation survey (English translation from the original version).**

| **Question** | **Answer options** |
| --- | --- |
| In general, how satisfied are you with the process of co-creating the menu of nature-based activities in Les Roquetes neighborhood? | Evaluation from 1 to 10 |
| Do you find it appropriate the way in which the project has arrived and has been linked to the neighborhood? | Evaluation from 1 to 10 |
| Do you find the way in which the project has communicated its objectives and needs adequate? | Evaluation from 1 to 10 |
| Do you find the information shared by RECETAS about the project adequate? | Evaluation from 1 to 10 |
| Do you think the way in which the project has been communicated with the different entities and people that have been linked is adequate? | Evaluation from 1 to 10 |
| Do you think that the project has been able to find synergies between the needs of the neighborhood and your own? | Yes / No |
| Please mark which sessions you have attended | Presentation of the project  First co-creation session  Second co-creation session  Results session |
| Do you find the number of sessions held in the neighborhood adequate? | Evaluation from 1 to 10 |
| In relation to the pilot study, the recruitment of people who feel alone will begin during this month. How do you think you could contribute? Mark those boxes that correspond to the contribution that you could manage from your organization. | Dissemination of the project  Selection of participants |
| I can disseminate the project through | Flyers  Email  Calls  Social media  Community spaces  Informative screen |
| Based on your experience, which aspects do you consider most important to encourage the participation of entities in the project? | Community participation  Professional training  Free transport for participants  Babysitting service  Continuity of the project |

**Table S4**. **Detailed information about the nature activities and spaces that conformed the NBSP Menu**.

| **Activity** | | **Schedule** | | **Description** | | | | | **Available resources** | | | **Required resources** | | | **Who for** |
| --- | --- | --- | --- | --- | --- | --- | --- | --- | --- | --- | --- | --- | --- | --- | --- |
| **Roquetes Community Plan** | | | | | | | | | | | | | | | |
| Caminaires | | Monday and Wednesday from 9.30 to 11.30 am | | It consists of a group of walkers led by a sports instructor. In July, there are also night walks at 10 pm so as not to be exposed to the heat. | | | | | Getting financing is very difficult and there is no guarantee it will continue in the long term. | | | In case of an extraordinary outing, overtime should be paid to the instructor. | | | Adults with the aim of improving their physical and relational health. |
| **Vall de Can Masdeu** | | | | | | | | | | | | | | | |
| [Centre Social Pics](https://www.canmasdeu.net/pic/) | | It is an activity we do two Sundays a month | | It is an event open to all where we run a range of activities. It is an ideal time to learn about suggestions from groups related to social, artistic, political and health topics | | | | | They should be specified based on needs, the number of people and the group frequency. However, we have all resources available. | | | Based on needs, the number of people and the frequency should be specified. | | | All kinds of people  Each project/activity has its own features that should be specifically defined based on the participation proposal. |
| [Dijous el Hort](https://www.canmasdeu.net/participar/dies-oberts/) | | Every Thursday | | A venue for participation around the vegetable garden where we learn and share how to run an organic garden. | | | | |
| [Horts Comunitaris](https://www.canmasdeu.net/educacio-%20agroecologica/) | | Activity with frequency to be specified | | Horts Comunitaris is a project formed by a group of 50 people who work horticultural plots in the valley. They draw on organic farming and community engagement. | | | | |
| [Visits and Agroecological Education](https://www.canmasdeu.net/educacio-agroecologica/) | | Monday, Tuesday, Wednesday, Friday or Saturday. Visits last between 2 and 3 hours. | | The project runs guided tours through the valley along with educational games and practical workshops to help participants deepen their understanding of topics. | | | | |
| **Som del Barri Association** | | | | | | | | | | | | | | | |
| Crafts and natural recycling workshop | | 2 theoretical sessions | | Finding materials in nature and creating a piece of craftwork | | | | | Neighbourhood venue | | | Pay the workshop leader.  Basic materials. | | | All kinds of people |
| **PES Cruïlla / Ke workshop: Ciutat Meridiana bicycle self-repair workshop** | | | | | | | | | | | | | | | |
| Bicycle route | | Schedule to be agreed with the organisation (open).  For bike repair: Wednesday from 5 pm to 8 pm. | | Bicycle route led by volunteers from the organisation and with the assistance of a mechanic in case a bike has to be repaired on the go. The route and the itinerary will be tailored to the group. | | | | | Fleet of bicycles, tools, spare parts and leaders for the route. | | | Possible financial compensation for the leaders of the routes. | | | Depending on the type of route, a minimum level of physical ability may be required for users, although it can be tailored to the group's profile. |
| **Humus Therapy (FTHVB)** | | | | | | | | | | | | | | | |
| Forest bathing | | Natural environment in les Roquetes. Length 2-3 hours. Ideally one session once a week. | | Activity designed to awaken the senses in a natural environment to work on health in various areas (mental, social, spiritual and physical) through a number of activities. | | | | | All you need is a nature area. | | | The activity is guided by a qualified person who has to be paid. | | | People with reduced mobility may not be able to do it. |
| **Cohabitatge CIRERES** | | | | | | | | | | | | | | | |
| Urban vegetable garden | | To be defined. | | Collaborate with an organic agriculture and urban green area project: terraces, vertical vegetable gardens and urban vegetable gardens on plots. | | | | | CIRERERS has a terrace in the building where you can experiment and grow edible vegetables. They are also in the process of running a community vegetable garden. | | | Financial compensation to the person who facilitates the session. | | | For anyone eager to learn how to grow their own food. Minimum physical capability may be required for some tasks. The urban vegetable garden project is still being consolidated in CIRERES, so in the autumn it will be possible to confirm how far the organisation can work with RECETAS. |
| **Els Tres Turons Foundation** | | | | | | | | | | | | | | | |
| Horticulture | | Can Soler, from 10 am to 12 noon, monthly activity. | | The horticulture workshop consists of a session where you can learn what a vegetable garden is and find about some aromatic plants and plant propagation techniques. | | | | | Physical space, tools and materials, technical gardening expert and support staff. | | | None | | | Suitable for anyone. |
| Forest bathing | | Can Soler, from 10 am to 12 noon, occasional activity. | | Emotional control session where mindfulness, awareness and sensory work techniques will be learned. | | | | | Physical venue and a psychologist expert in activities in nature. | | |
| Planting and care of fruit trees | | Can Soler, from 10 am to 12 noon, monthly. | | Activity about the recovery of fruit crops through planting, pruning and irrigation. | | | | | Physical venue, tools, trees, work technician and support staff. | | |
| **Self-managed - proposed by SOM NATURA** | | | | | | | | | | | | | | | |
| Tree surrounds | | To be agreed by the group. | | Maintenance tree surrounds. These spaces are run by the Municipal Institute of Parks and Gardens and are provided for an initial period of one year which may be renewed each year. | | | | | No resources available | | | Plants and work tools to be provided by the project or alternative organisations. | | | Suitable for anyone. To get the space, the activity must be reported online at: *Cuida l'escocell.* |
| **Les Roquetes - Rafa Juncadella Library** | | | | | | | | | | | | | | | |
| Bibliohort | | To be agreed by the group | | Weekly meetings to take care of a small garden created in grow tables and arranged in one of the library’s yards. | | | | | Resources provided by the library. | | | Suitable for anyone. | | |  |
| **Trinitat Nova Casa de l’Aigua** | | | | | | | | | | | | | | | |
| Reconnect with nature | | Every two months | | Quiet walk to enhance the aspects of perception and the senses. | | | | | The organisers supply the material and utensils. | | | None.  Free (prior booking required) | | | For all audiences |
| The signs and traces of our neighbours | | Discovering tracks and traces of animals or neighbours. Making a mud track. | | | | |
| **Cooperative Tapurna** | | | | | | | | | | | | | | | |
| The vegetable garden at the Vall d’Hebron and Teixonera marketplace | | Vall d'Hebron Road 134, at the top of the Vall d’Hebron and Teixonera marketplace, 1st floor. Tuesdays, Wednesdays or Thursdays, 9.30 - 12 pm.; Saturdays, 10 to 14 pm; Fridays, 15.30 to 18.30 p.m. | | Community urban vegetable garden promoting agroecology and food sovereignty to contribute to a fairer, healthier, resilient and more sustainable city. The project offers the following activities: community tasks, presentation of projects to develop within the vegetable garden and workshops on a variety of topics in the agricultural field. | | | | |  | | | There is the possibility to organise and develop workshops as demand and specific needs come in by hiring an external trainer. | | | Open to all publics. It is an all-inclusive project, open, plural and accessible for persons with reduced mobility. Suitable to all ages, profiles and groups. |
| **Torre Baró Castle** | | | | | | | | | | | | | | | |
| Collserola unseen | | Circular activity around Torre Baró Castle. Saturdays 10-10.30 to 12:00 p.m. | | Itinerary that runs through the sun-bathed surroundings of the Castle and part of a shady path and getting to know species of the Mediterranean vegetation adapted to the shortage of water. | | | | | Material of support: flyer with species native to Catalonia. | | | Comfortable footgear and clothes are recommended, plus a bottle of water. | | | Low difficulty itinerary. Not advisable for persons with reduced mobility, though. |
| Nature, presence and emotion | | Circular activity around the Torre Baró Castle. Saturdays 10-10.30 to 12.30-13.00 pm. Week days under demand | | Sessions where you are invited to broaden your connection with yourself and your emotional expression through several activities that foster your anchorage in the here and now through keeping in touch with nature | | | | |  | | | Comfortable footgear and clothes are recommended, plus a bottle of water. | | | Low physical difficulty activity. Not advisable for persons with reduced mobility. |
| From the Castle to the Muguera Spring | | Circular activity around the Torre Baró Castle. Saturdays 10-10.30 to 12.30 pm. It is offered once per term but also available under demand | | Itinerary through the shady side of Collserola. Walkers are accompanied to discover and enjoy the beautiful and calm path leading to the Muguera spring and to identify the main threats to the site: the fires and invasive species. | | | | | Material of support: invasive vegetal species flyer. | | | Comfortable footgear and clothes are recommended, plus a bottle of water. | | | Mid difficulty path. Not advisable for people with mobility issues or out of use of walking sloping lands. |
| Climatic change and adaptations | | Circular activity around the Torre Baró Castle. Saturdays 10-10.30 to 12:00 p.m.  Once per term and also under demand. | | Itinerary through the sun-bathed surroundings of the castle, where climate change will be debated starting from prior knowledge of participants, while further concepts will be broadened to enlarge awareness of its present and future effects over environment. | | | | | Material of support: painting sheets showing different images of relevance | | |  | | | Itinerary of low difficulty. Not advisable for persons with mobility issues. |
| The Castle’s environment | | Cicular activity around the Torre Baró Castle. 10-10.30 to 12.00 pm. Once per season and also available under demand. | | Itinerary where walkers are invited to discover several landscapes and to notice the human influx thereupon, specially where nature and city merge into each other. | | | | | Material of support: painting sheets showing different images of relevance. | | |  | | | Low difficulty itinerary. Not advisable for persons with reduced mobility, though. |
| **CREAF and GBIF Spain** | | | | | | | | | | | | | | | |
| iNaturalist | | Anyplace, any time, with any frequency. | | iNaturalist is a platform to register observations of biodiversity. Observations are made up by a photo, the date, the hour and the place where the spotting of a plant or animal occurred. With these data provided by citizens, scientists can study existing flora and fauna (so-called civic science). | | | | | Guide of initiation and use of iNaturalist /Advice by CREAF on how to use the tool and to assemble a project. | | | Interest in nature and learning the name of plants, animals and fungi and in knowing which plants and animals cohabit in a particular place. | | | For everybody!  A minimum knowledge needed about use of mobile telephone or tablet and a minimum user ability with mobile or tablet applications, or either the company of somebody with such abilities. |
| **CREAF and Metereological Service of Catalonia** | | | | | | | | | | | | | | | |
| RitmeNatura | All round the year, especially in the spring autumn months / Observations must be sent ideally once per week but frequency may be adapted to participants’ availability. | | | | | RitmeNatura is a scientific project relying on civic collaboration to register the behaviours of the natural beings as modified by climate. Science obtains plenty of information about how climate change may change the rhythm of plants and animals thanks to the observation of nature. To take part in the project only a mobile telephone is needed to down-load of the application iNaturalist and take photographs of nature. | | Informative flyers.  Specific formative workshop, with theoretical and practical part. Digital resprings available for consultation on the project’s web. | | | Mobile telephone, tablet and/or computer with internet connection via data or WiFi. | | | Activity inviting to share knowledge and observations.  Ideal to develop around in the city (urban biodiversity).  Ideal to develop along a frequent path (the way back home from school, from the shops or from walking the dog). Limitation: observations must be taken in places with vegetation. Necessary a minimum ability with mobile telephone or tablet and apps. | |
| **Barcelona City’s Council** | | | | | | | | | | | | | | | |
| Activate yourself at the park | | | NOU BARRIS.  PLAÇA DE L’AQUEDUCTE  C. Moixeró. | | Monday 10 to 11 a.m.: Tai chi and Chi gung.  Wednesday 10 to 11 a.m. Motor functions and memory. | |  | | |  | | |  | | |

**Table S5. Results from the evaluation survey (English translation from the original version) (n=11).**

| **Questions** | **Score (0-10)** | **n (%)** |
| --- | --- | --- |
| In general, how satisfied are you with the process of co-creating the menu of nature-based activities in Les Roquetes neighborhood? | 10  9  8 | 1(10%)  5 (50%)  4 (40%) |
| Do you find it appropriate the way in which the project has arrived and has been linked to the neighborhood? | 10  9  8  7 | 2 (20%)  3 (30%)  4 (40%)  1 (10%) |
| Do you find the way in which the project has communicated its objectives and needs adequate? | 10  9  8  7 | 1 (10%)  5 (50%)  4 (40%)  1 (10%) |
| Do you find the information shared by RECETAS about the project adequate? | 10  9  8  7 | 2 (20%)  4 (40%)  3 (30%)  1 (10%) |
| Do you think the way in which the project has been communicated with the different entities and people that have been linked is adequate? | 10  9  8  7 | 1 (10%)  4 (40%)  4 (40%)  1 (10%) |
| Do you think that the project has been able to find synergies between the needs of the neighborhood and your own? | Yes  No | 9 (90%)  1 (10%) |
| Please mark which sessions you have attended | Presentation of the project  First co-creation session  Second co-creation session  Results session | 7  6  7  7 |
| Do you find the number of sessions held in the neighborhood adequate? | 10  9  8  7 | 2  4  3  1 |
| Do you find the way in which the sessions have been run adequate to achieve the objective? | 10  9  8  7 | 2  3  4  1 |
| In relation to the pilot study, the recruitment of people who feel alone will begin during this month. How do you think you could contribute? Mark those boxes that correspond to the contribution that you could manage from your organization. | Dissemination of the project  Selection of participants | 5  4 |
| I can disseminate the project through | Flyers  Email  Calls  Social media  Community spaces  Informative screen | 5  3  2  1  1  1 |
| Based on your experience, which aspects do you consider most important to encourage the participation of entities in the project? | Community participation  Professional training  Free transport for participants  Babysitting service  Continuity of the project | 6  4  4  4  1 |
